1 **Title: Identifying Patient Subpopulations with Significant Race-Sex Differences in**  
2 **Emergency Department Disposition Decisions**

3 **Short title:** Race-Sex Differences in Emergency Department Disposition Decisions

4 **Authors:** Peter Lin<sup>1</sup>, Nilay T Argon<sup>1</sup> PhD, Qian Cheng<sup>1</sup> PhD, Christopher S Evans<sup>2,3</sup> MD  
5 MPH, Benjamin Linthicum<sup>4</sup> DNP, Yufeng Liu<sup>1,5,6,7,8</sup> PhD, Abhishek Mehrotra<sup>4</sup> MD MBA,  
6 Laura Murphy<sup>4</sup> MD, Mehul D Patel<sup>4</sup> PhD, Serhan Ziya<sup>1</sup> PhD

7 <sup>1</sup>: Department of Statistics and Operations Research, University of North Carolina, Chapel Hill, NC, USA

8 <sup>2</sup>: Information Services, ECU Health, Greenville, NC, USA

9 <sup>3</sup>: Department of Emergency Medicine, East Carolina University, Greenville, NC, USA

10 <sup>4</sup>: Department of Emergency Medicine, University of North Carolina, Chapel Hill, NC, USA

11 <sup>5</sup>: Department of Genetics, University of North Carolina, Chapel Hill, NC, USA

12 <sup>6</sup>: Department of Biostatistics, University of North Carolina, Chapel Hill, NC, USA

13 <sup>7</sup>: Carolina Center for Genome Sciences, University of North Carolina, Chapel Hill, NC, USA

14 <sup>8</sup>: Lineberger Comprehensive Cancer Center, University of North Carolina, Chapel Hill, NC, USA

15 **Corresponding author:** Nilay T Argon, nilay@unc.edu

16 **Financial support:** This work was partially supported by grant R03HS029078 from the Agency  
17 for Healthcare Research and Quality.

18

19

20

21 **Abstract**

22 Background/Objectives: The race-sex differences in emergency department (ED)  
23 disposition decisions have been reported widely. Our objective is to identify demographic  
24 and clinical subgroups for which this disparity is most pronounced, which will facilitate  
25 future targeted research and potential interventions.

26 Methods: We performed a retrospective analysis of 93,987 Caucasian and African-  
27 American adults assigned an Emergency Severity Index of 3 at three large EDs from  
28 January 2019 to February 2020. Using random forests, we identified the Elixhauser  
29 comorbidity score, age, and insurance status as important variables to divide data into  
30 subpopulations. Logistic regression models were then fitted to test race-sex disparities  
31 within each subpopulation while controlling for other patient characteristics and ED  
32 conditions.

33 Results: In each subpopulation, African-American women were less likely to be admitted  
34 than Caucasian men with odds ratios as low as 0.304 (95% confidence interval (CI):  
35 [0.229, 0.404]). African-American men had smaller admission odds compared to  
36 Caucasian men in subpopulations of 41+ years of age or with very low/high Elixhauser  
37 scores, odds ratios being as low as 0.652 (CI: [0.590, 0.747]). Caucasian women were  
38 less likely to be admitted than Caucasian men in subpopulations of 18-40 or 41-64 years  
39 of age, with low Elixhauser scores, or with Self-Pay or Medicaid insurance status with  
40 odds ratios as low as 0.574 (CI: [0.421, 0.784]).

41 Conclusions: African-American women faced disparities in all subgroups while disparities  
42 were lessened by younger age for African-American men, and by older age, higher

43 Elixhauser score, and Medicare or Commercial insurance for Caucasian women. In  
44 general, patients of age 64 years or younger, with low comorbidity scores, or with  
45 Medicaid or no insurance appeared most prone to disparities in admissions.

46 **Keywords:** Racial disparity; sex disparity; disposition decision, emergency department,  
47 logistic regression, random forests

## 48 **INTRODUCTION**

49 The disposition decision is an important timepoint during a patient's visit to an emergency  
50 department (ED) as it represents a split in the patient's path through the healthcare  
51 system. Even though patients may no longer remain within an ED after receiving a  
52 disposition, this decision continues to affect their health in the long term<sup>1,2,3</sup>. Consequently,  
53 patients facing disparities in disposition decisions may be impacted long after they depart  
54 the ED, and hence, it is of interest to study disparities surrounding disposition decisions  
55 closely. An American College of Emergency Physicians workgroup convened in 2021  
56 identified the measurement of disparities in ED processes, including disposition decision,  
57 as a priority to promote health equity in emergency medicine<sup>4</sup>.

58 Disparities have been shown to affect ED patients in many different decisions and specific  
59 situations<sup>5,6,7</sup>. Opioid prescribing practices have been documented to vary by patient  
60 race<sup>8,9,10</sup>. Patients, both adult and pediatric, suffering from chest pain, have received  
61 different treatments depending on sex, race, and insurance status<sup>11,12</sup>. Those who display  
62 potential acute coronary syndrome received different care depending on their sex<sup>13</sup> or if  
63 they were Caucasian or African American<sup>14,15</sup>. In addition, disparities have been shown  
64 to impact triage score assignment<sup>16,17,18,19</sup> as well as rooming prioritization<sup>20,21</sup>, with

65 African-American and Hispanic patients receiving less acute scores and being less likely  
66 to be prioritized for rooming.

67 Several studies have also investigated disparities surrounding ED disposition decisions.  
68 In particular, women, African Americans, and uninsured patients have been found to be  
69 less likely to be admitted from the ED compared to men, Caucasians, and privately  
70 insured patients<sup>22,23,24,25,26,27,28</sup>, respectively. Furthermore, uninsured and Medicaid patients  
71 and women are more likely to leave an ED against medical advice<sup>29,30</sup>. To date, much of  
72 the literature on disparities in ED disposition has focused on specific conditions or  
73 complaints, such as chest pain and injury, or adjusting by broad groupings of clinical  
74 factors. There is limited evidence on patient subgroups prone to inequitable ED  
75 disposition decisions, which would be invaluable to understanding the causes of these  
76 disparities and to tailoring and targeting interventions to address them. Given ED patients'  
77 demographic and clinical profiles are highly heterogeneous, machine learning methods,  
78 such as random forests, can improve the performance of predictive models<sup>31</sup>.

79 In this retrospective study of adult, intermediate-acuity patients presenting to the ED, we  
80 examined the extent of race and sex disparities in ED disposition decisions within  
81 important demographic and clinical subgroups identified by random forests. Specifically,  
82 we tested the null hypothesis that the disposition decision (admit or discharge) did not  
83 vary by patient race-sex combination within important patient subgroups when controlling  
84 for patient-level and ED operational characteristics. Our objective was to identify  
85 subgroups in which race-sex disparities were most pronounced to facilitate future  
86 research that evaluates potential mechanisms and explores tailored interventions.

87

88 **METHODS**

89 We performed a retrospective analysis of data from three EDs in the Southeastern United  
90 States from January 1, 2019 through February 29, 2020. ED A is part of a large academic  
91 medical center, containing 59 beds divided among five adult care areas and one pediatric  
92 care area. ED B is part of a large community hospital in an urban area, with 48 beds split  
93 among four care areas. ED C is part of a large hospital serving a predominantly African-  
94 American population in both urban and rural areas. It has 38 beds split between a main  
95 care area, a fast-track area for low acuity patients and separate dedicated areas for  
96 behavioral health, high intensity, and trauma patients. Notably, the county where ED C is  
97 located had a median household income of \$55,956 in 2021 compared to respective  
98 median household incomes of \$79,814 and \$91,558 for the counties where ED A and B  
99 are located<sup>32</sup>.

100 Patients were included in the analysis if they were adults (at least 18 years old) who were  
101 assigned an Emergency Severity Index (ESI) score of 3 (intermediate acuity). These  
102 patients have a similar level of severity and hence are expected to receive similar  
103 treatment from decision makers. In addition, the majority of patients both within the study  
104 EDs and in general<sup>33</sup> receive an ESI 3 score at triage. Additional eligibility criteria included  
105 being seen in one of the main ED care areas, having complete event timestamps in the  
106 electronic health record data, being Caucasian or African American, and being admitted  
107 to the hospital or discharged from the ED. Interfacility transfers were excluded. Patients  
108 were also excluded if they had a sex other than male or female or races other than  
109 Caucasian or African American due to the low patient counts within those demographics  
110 affecting model parameter estimates.

111 **Primary outcome and covariates**

112 The primary outcome in all our models was whether a given patient was admitted versus  
113 discharged at the end of an ED visit. Differences in disposition decisions were evaluated  
114 between four race-sex groups: African-American female, African-American male,  
115 Caucasian female, and Caucasian male (referent).

116 In all our models, we adjusted for covariates that were deemed to correlate with admission  
117 decisions: age, ethnicity, chief complaint, insurance status, weighted Elixhauser score,  
118 care area where disposition was decided, day of week, hour of day, and average waiting  
119 time in the ED (as a proxy for crowding level). Patient age was categorized into three  
120 groups: 18-40, 41-64, 65 and older. The chief complaint for each patient was first grouped  
121 into one of 17 categories<sup>34</sup>, which we further reduced to 13 by combining “General/Minor”  
122 and “Environmental” as well as merging the three different “ENT” categories. The  
123 weighted Elixhauser comorbidity score<sup>35,36</sup> was calculated using provided ICD-10 codes  
124 and the R comorbidity package<sup>37</sup>. All patient-level insurance information was collapsed to  
125 reduce the number of required parameters in the models. Specifically, primary and  
126 secondary insurance information was used to group patients into a single insurance  
127 status variable as follows: patients with “Medicaid” listed for either primary or as the sole  
128 secondary insurance were grouped into a “Medicaid” group; Self-Pay patients were  
129 grouped together in a separate group. All remaining patients were then placed into  
130 “Commercial/Other” or “Medicare,” depending on what their primary insurance was listed  
131 as. Furthermore, for each patient we noted the hourly block during which they received  
132 their disposition decision. We then calculated the mean length of time from the end-of-  
133 triage to first-seen-by-provider for all patients who entered the waiting room during that

134 same hourly block and used this mean as the ED crowding measure at the time of the  
135 disposition decision. The time of day for disposition decision was recorded as one of six  
136 four-hour blocks (12 am to 4 am, 4 am to 8 am, 8 am to 12 pm, 12 pm to 4 pm, 4 pm to 8  
137 pm, and 8 pm to 12 am).

### 138 **Statistical analysis**

139 First, using the entire dataset, we fitted a logistic regression model for each ED with all  
140 covariates. (Table S1 in the Supplement provides reassuring results of a test that we used  
141 to check for potential multicollinearity issues.) In each of these logistic regression models  
142 we then computed odds ratios (OR) and 95% confidence intervals (CI) and tested the  
143 significance of patient race-sex to determine whether there was evidence of disparity,  
144 considering p-values less than 0.05 to be statistically significant.

145 To select patient subgroups in which to test race-sex disparities, we first fitted a random  
146 forest for each ED<sup>38,39</sup> to obtain variable importance plots that reflect the relative  
147 importance of each predictor to model accuracy. (For each random forest, we randomly  
148 selected 70% of the corresponding ED's data for training and used the remaining 30% for  
149 testing.) Each random forest comprised of 500 decision trees, each of which was fitted  
150 using 4 predictors selected randomly from the entire pool of 10 covariates. The  
151 importance of each predictor was determined through the mean decrease in accuracy  
152 when that particular variable was permuted in the out-of-bag data. The random forests  
153 were fitted using the randomForest<sup>40</sup> package in R<sup>41</sup>.

154 Using the variable importance plots, we then selected three of the most important  
155 variables for subgroupings: the weighted Elixhauser score, age group, and insurance

156 status. Although the chief complaint category was found to be important consistently  
157 across EDs, we did not use it to split our data because of its large number of categories  
158 potentially resulting in small sample sizes. Since the weighted Elixhauser score is a  
159 continuous variable, groups were set to be 0 and below, 1 through 6, and 7 and above.  
160 Age and insurance status groups were set as defined above. For each level we then fitted  
161 a logistic regression model using the data belonging to that level with all the covariates  
162 except for the one that was being examined. In each of these logistic regression models  
163 we then computed ORs and 95% CIs and tested the significance of patient race-sex within  
164 each patient subpopulation. All calculations and analysis were performed using R 3.5.3.

165 This study was reviewed by the IRB at the University of North Carolina at Chapel Hill and  
166 determined to be exempt from IRB review. Upon this IRB exemption, a study dataset was  
167 provided to the authors on November 18<sup>th</sup>, 2022. The authors did not have access to  
168 information that could identify individual participants. As a retrospective study of existing  
169 data with limited identifiers (i.e., patient age and encounter date-times), informed consent  
170 was not required.

## 171 **RESULTS**

172 Table 1 shows a breakdown of study patient characteristics as well as admission rates  
173 for each group (Table S2 shows breakdowns of additional characteristics). In total, there  
174 were 28,341, 39,048, and 26,598 study patients from EDs A, B, and C with overall  
175 admission rates of 35.5%, 30.3%, and 19.2%, respectively. ED B predominantly served  
176 Caucasian patients and had the oldest population as well as the highest proportion of  
177 patients with commercial insurance at 53.9% compared to 44.6% and 30.4% at EDs A  
178 and C. ED C served predominantly African-American patients and had the lowest



179 admission rates among all study EDs. (The difference in admission rates at the three EDs  
180 could be attributable to differences in patient population characteristics, utilization of ED  
181 resources, and access to healthcare resources such as urgent care centers in the local  
182 area.) We also see that ED C had the highest proportions of patients with Medicaid or  
183 Self-Pay insurance status.

184 The logistic regression models fitted on the entire datasets for each ED found that all  
185 covariates except for patient ethnicity were statistically significant by means of likelihood  
186 ratio tests. (The small number of Hispanic patients may explain why ethnicity was the sole  
187 insignificant predictor.) The ORs and 95% CIs are provided in Table 2. Caucasian men  
188 were significantly more likely to be admitted than any other Race-Sex combination at all  
189 three EDs: Estimated odds ratios of admission for all other Race-Sex combinations  
190 ranged between 0.55 and 0.89 when Caucasian men was the reference level, with  
191 African-American women having the lowest odds ratios of admission at all three EDs. As  
192 expected, the older age groups were more likely to be admitted at EDs A, B, and C with  
193 respective odds ratio estimates of 1.68, 2.22, and 2.25 for the 41 through 64 age group  
194 and odds ratios of 2.25, 3.88, and 3.25 for the 65 and older group when compared to the  
195 18 through 40 year old group. Of the chief complaint categories, ENT, Genitourinary,  
196 Neurologic, Obstetrics/Gynecology, Ophthalmology, Orthopedic, and Trauma patients  
197 were significantly more likely to be discharged than Cardiovascular patients at all three  
198 EDs. Medicaid and Medicare patients were significantly more likely to be admitted than  
199 Commercial/Other patients, with odds ratios ranging from 1.13 to 1.46, and Self-Pay  
200 patients were significantly less likely to be admitted with odds ratios ranging between 0.72  
201 and 0.77. Patients with higher Elixhauser scores were more likely to be admitted at all

202 three EDs. At all EDs, the crowding metric was significant, with admission likelihood  
203 increasing when the mean waiting time is higher.

204 Using the random forests fitted for each ED, we observed that the Elixhauser score, age  
205 group, chief complaint, and insurance status were consistently at the top in terms of  
206 predictor importance (see Figure 1). The random forests had test accuracies of 68.9%,  
207 72.1%, and 81.4% for EDs A, B, and C, respectively. As described above, we split the  
208 population according to the weighted Elixhauser score, age group, and insurance status.

209 Figure 2 shows the odds ratio plots from the models formed by splitting the patient  
210 population according to weighted Elixhauser score. At all three EDs, African-American  
211 women were significantly less likely to be admitted than Caucasian men regardless of the  
212 Elixhauser score with odds ratios being as low as 0.45 for low Elixhauser category.  
213 African-American men and Caucasian women were also significantly less likely to be  
214 admitted if they had a low Elixhauser at all three hospitals. Within the middle Elixhauser  
215 group, the disparities seemed to disappear except for African-American women. In the  
216 high Elixhauser group, Caucasian women were not disadvantaged against Caucasian  
217 men at any of the EDs but both African-American men and women were less likely to be  
218 admitted compared to Caucasian men.

219 The next group of models explored how the presence of disparities changed between age  
220 groups. Figure 3 shows the associated odds ratio plots for the different age groups at  
221 each ED. Across all age groups, African-American women were less likely to be admitted  
222 compared to Caucasian men. When examining only Caucasian patients, the sex effect  
223 was reduced for older patients, culminating in Caucasian men and women with 65+ years  
224 of age having no significant differences in admission likelihood. We also observed a

225 diminished racial disparity for younger males in EDs A and B, with Caucasian males and  
226 African-American males in the 18 through 40 group having no statistically significant  
227 difference in admission likelihood. Race-sex disparities existed in the 41 through 64-year-  
228 old group across all three EDs.

229 The final group of models was formed using patients with the same insurance status.  
230 Figure 4 shows the odds ratios for each Race-Sex category for different insurance groups.  
231 Regardless of the insurance status, African-American women were less likely to be  
232 admitted than Caucasian men at all EDs except for Medicare patients at ED A.  
233 Considering all insurance groups, Medicare patients faced the least disparities. Within  
234 this group, no disparities were observed for any Race-sex category except for African-  
235 American women at EDs B and C and for African-American men at ED C. On the other  
236 hand, disparities were prevalent in all other insurance groups except for Caucasian  
237 female and African-American male patients with Commercial/Other insurance at ED A,  
238 with Medicaid insurance at ED B, and who were in Self-Pay insurance category at ED C.

## 239 **DISCUSSION**

240 Our retrospective study of adult, intermediate-acuity ED patients found that African-  
241 American women were less likely to be admitted than Caucasian men at all three EDs  
242 regardless of subgroupings by comorbidity score, age, or insurance status (with the only  
243 exception being Medicare patients at ED A). Moreover, African-American women trended  
244 toward the lowest likelihood of admission compared to all other race-sex groups. In  
245 addition, we observed that African-American men also faced disparities compared to  
246 Caucasian men consistently across EDs within certain subpopulations. These findings  
247 raise further questions about the general presence of racial disparities within EDs as this

248 pattern held regardless of whether the ED served predominantly Caucasian patients (EDs  
249 A and B) or African-American patients (ED C).

250 There have been several studies examining both patient and provider related factors that  
251 correlate with the disposition decision. For example, more senior physicians were found  
252 to have higher discharge rates<sup>42</sup>. On the patient side, women, African-Americans, and  
253 uninsured patients have been found to be less likely to be admitted from the ED compared  
254 to men, Caucasians, and privately insured patients, respectively, after accounting for age,  
255 acuity, comorbidities, and other factors<sup>22,23,24,25,26</sup>. Among heart failure patients,  
256 Caucasians have been found to be more likely to be admitted than African Americans<sup>27</sup>.  
257 Also, Maori patients in New Zealand were found to be less likely to be admitted than non-  
258 Maori patients who presented with similar triage acuities<sup>28</sup>. Our findings add further  
259 support to these preceding studies about the presence of disposition disparities and how  
260 they affect different types of patients.

261 Our subgroup analyses of highly predictive factors identified by random forests suggest  
262 that disparities were less prevalent for patients with the highest rates of admission: high  
263 Elixhauser, ages 65 years and older, and Medicare insurance. In particular, we note that  
264 the sex disparity was less prevalent within high Elixhauser score patients as there was  
265 no significant difference between male and female Caucasian patients; we also observed  
266 overlapping confidence intervals for male and female African-American patients for this  
267 group. In addition, Medicare patients were the least likely group to face disparities.

268 According to our data, patients with low Elixhauser score, ages less than 65 years, and  
269 Self-pay were most prone to race-sex disparities in ED disposition, although these results  
270 varied by ED. More specifically, the subpopulations that were most vulnerable to

271 disparities in disposition decision in this study were (i) African-American women, (ii)  
272 African-American men who were 41+ years of age or who had very low/high comorbidity  
273 scores, and (iii) Caucasian women who were younger than 65 years of age, who had low  
274 comorbidity scores, or whose insurance status was Medicaid or Self-Pay. Our future  
275 research will investigate the causes and potential mechanisms of race-sex disparities in  
276 ED disposition. Further, we plan to explore potential solutions to these disparities tailored  
277 and targeted to patient subgroups with the largest magnitude of race-sex inequities.

## 278 **LIMITATIONS**

279 This study had several limitations. Patient race and ethnicity were taken directly from what  
280 was recorded in the electronic health record system during clinical care instead of being  
281 prospectively collected. However, less than 0.1% of all patient encounters had missing  
282 demographic information and furthermore, this information was collected by trained  
283 personnel. We did not have data on the sex and race of the clinicians making the  
284 disposition decisions, both of which could be important explanatory variables for a study  
285 on patient race-sex disparities.

286 We only considered Caucasian and African-American race categories as well as only  
287 male and female sex categories in this study, primarily due to insufficient sample sizes  
288 for other categories. We would need additional data from other sexes and races to further  
289 generalize our conclusions about disparities and how admission decisions are made with  
290 respect to other demographic groups.

291 Our models may not account for several unmeasured covariates that affect the admission  
292 decision-making process. For example, there are comorbidities that affect demographic

293 groups differently such as end stage renal disease (ESRD) or sickle cell disease<sup>43</sup>. We  
294 do not explicitly account for these specific comorbidities that may impact the likelihood of  
295 admission.

296 We did not have data on patient outcomes following ED disposition and were not able to  
297 determine the most appropriate disposition decision for each patient. The goal of this  
298 study was to examine admission from the ED as a process measure to compare by patient  
299 sex and race. However, we acknowledge that discharge from the ED can be the more  
300 favorable decision for certain patients.

301 Finally, this study considered three large EDs that are located within the Southeastern  
302 US. Therefore, our results should not be generalized to EDs with smaller patient  
303 populations and to EDs in other geographic locations with potentially different population  
304 demographics.

## 305 **CONCLUSIONS**

306 We observed varying levels of disparities in admission decisions for African-American  
307 men and women as well as Caucasian women when compared with Caucasian men  
308 within the adult ESI 3 patient populations from three large EDs in the Southeastern US.  
309 After stratifying on three patient characteristics highly predictive of admission in random  
310 forests, we identified consistent significant in disposition decisions by patient sex and race.  
311 Our findings indicated that certain disparities disappeared or weakened for high  
312 Elixhauser score patients, Medicare patients, and older patients. In contrast, Medicaid  
313 and Self-Pay patients as well as those who had less severe comorbidities were more  
314 likely to face disparities. African-American women were consistently less likely to be

315 admitted when compared to Caucasian men, even after splitting the data according to  
316 age, insurance status, or Elixhauser score.

317 **REFERENCES**

318 1. Dhingra K, Laurin E. Emergency medicine clerkship primer: a manual for medical  
319 students. *Acad Emerg Med*. 2009; 16: e39-e39. doi: 10.1111/j.1553-2712.2009.00579.x

320 2. Junhasavasdikul D, Theerawit P, Kiatboonsri S. Association between admission delay  
321 and adverse outcome of emergency medical patients. *Emerg Med J*. 2013;30(4):320-323.  
322 doi:10.1136/emered-2011-200788

323 3. Fernando SM, Rochweg B, Reardon PM, et al. Emergency Department disposition  
324 decisions and associated mortality and costs in ICU patients with suspected infection. *Crit*  
325 *Care*. 2018;22(1):172. Published 2018 Jul 6. doi:10.1186/s13054-018-2096-8

326 4. Khidir H, Salhi R, Sabbatini AK, et al. A Quality Framework to Address Racial and  
327 Ethnic Disparities in Emergency Department Care. *Ann Emerg Med*. 2023;81(1):47-56.  
328 doi:10.1016/j.annemergmed.2022.08.010

329 5. Thomas YT, Jarman AF, Faynshtayn NG, Buehler GB, Andrabi S, McGregor AJ.  
330 Achieving Equity in Emergency Medicine Quality Measures Requires a Sex and Gender  
331 Lens. *J Emerg Med*. 2023 Jul;65(1):e60-e65. doi: 10.1016/j.jemermed.2023.03.063.  
332 Epub 2023 Mar 17. PMID: 37331918; PMCID: PMC10505242.

333 6. Stillman K, Mirocha J, Geiderman J, Torbati S. Characteristics of Patients Restrained  
334 in the Emergency Department and Evaluation for Disparities in Care. *J Emerg Med*. 2023

- 335 Nov;65(5):e393-e402. doi: 10.1016/j.jemermed.2023.05.008. Epub 2023 Jun 4. PMID:  
336 37722949.
- 337 7. Goldfarb SS, Graves K, Geletko K, Hansen MD, Kinsell H, Harman J. Racial and Ethnic  
338 Differences in Emergency Department Wait Times for Patients with Substance Use  
339 Disorder. *J Emerg Med.* 2023 Apr;64(4):481-487. doi: 10.1016/j.jemermed.2023.02.015.  
340 Epub 2023 Mar 21. PMID: 36997432.
- 341 8. Tamayo-Sarver JH, Hinze SW, Cydulka RK, Baker DW. Racial and ethnic disparities  
342 in emergency department analgesic prescription. *Am J Public Health.* 2003;93(12):2067-  
343 2073. doi:10.2105/ajph.93.12.2067
- 344 9. Heins JK, Heins A, Grammas M, et al. Disparities in analgesia and opioid prescribing  
345 practices for patients with musculoskeletal pain in the emergency department. *J Emerg*  
346 *Nurs.* 2006;32(3):219-224. doi:10.1016/j.jen.2006.01.010
- 347 10. Singhal A, Tien YY, Hsia RY. Racial-Ethnic Disparities in Opioid Prescriptions at  
348 Emergency Department Visits for Conditions Commonly Associated with Prescription  
349 Drug Abuse. *PLoS One.* 2016;11(8):e0159224. Published 2016 Aug 8.  
350 doi:10.1371/journal.pone.0159224
- 351 11. Hambrook JT, Kimball TR, Khoury P, et al. Disparities exist in the emergency  
352 department evaluation of pediatric chest pain. *Congenit Heart Dis.* 2010;5(3):285-291.  
353 doi:10.1111/j.1747-0803.2010.00414.x
- 354 12. Humphries KH, Lee MK, Izadnegahdar M, et al. Sex differences in diagnoses,  
355 treatment, and outcomes for Emergency Department patients with chest pain and



- 356 elevated cardiac troponin. *Acad Emerg Med.* 2018;25(4):413-424.  
357 doi:10.1111/acem.13371
- 358 13. Gauthier V, Montaye M, Ferrières J, et al. Sex differences in time trends in acute  
359 coronary syndrome management and in 12-month lethality: Data from the French  
360 MONICA registries. *Int J Cardiol.* 2022;361:103-108. doi:10.1016/j.ijcard.2022.05.040
- 361 14. DeVon HA, Burke LA, Nelson H, Zerwic JJ, Riley B. Disparities in patients presenting  
362 to the emergency department with potential acute coronary syndrome: it matters if you  
363 are Black or White. *Heart Lung.* 2014;43(4):270-277. doi:10.1016/j.hrtlng.2014.04.019
- 364 15. Alrwisan A, Eworuke E. Are Discrepancies in Waiting Time for Chest Pain at  
365 Emergency Departments between African Americans and Whites Improving Over Time?  
366 *J Emerg Med.* 2016 Feb;50(2):349-55. doi: 10.1016/j.jemermed.2015.07.033. Epub 2015  
367 Sep 12. PMID: 26371975.
- 368 16. Schrader CD, Lewis LM. Racial disparity in emergency department triage. *J Emerg*  
369 *Med.* 2013;44(2):511-518. doi:10.1016/j.jemermed.2012.05.010
- 370 17. Zook HG, Kharbanda AB, Flood A, Harmon B, Puumala SE, Payne NR. Racial  
371 Differences in Pediatric Emergency Department Triage Scores. *J Emerg Med.* 2016  
372 May;50(5):720-7. doi: 10.1016/j.jemermed.2015.02.056. Epub 2016 Feb 15. PMID:  
373 26899520; PMCID: PMC4851931.
- 374 18. Joseph JW, Kennedy M, Landry AM, et al. Race and Ethnicity and Primary Language  
375 in Emergency Department Triage. *JAMA Netw Open.* 2023;6(10):e2337557. Published  
376 2023 Oct 2. doi:10.1001/jamanetworkopen.2023.37557

- 377 19. Patel MD, Lin P, Cheng Q, et al. Patient sex, racial and ethnic disparities in emergency  
378 department triage: A multi-site retrospective study. *Am J Emerg Med*. Published online  
379 November 10, 2023. doi:10.1016/j.ajem.2023.11.008
- 380 20. Lin P, Argon NT, Cheng Q, et al. Disparities in emergency department prioritization  
381 and rooming of patients with similar triage acuity score. *Acad Emerg Med*.  
382 2022;29(11):1320-1328. doi:10.1111/acem.14598
- 383 21. Sangal RB, Su H, Khidir H, et al. Sociodemographic disparities in queue jumping for  
384 emergency department care. *JAMA Netw Open*. 2023;6(7):e2326338. Published 2023  
385 Jul 3. doi:10.1001/jamanetworkopen.2023.26338
- 386 22. Selassie AW, McCarthy ML, Pickelsimer EE. The influence of insurance, race, and  
387 gender on emergency department disposition. *Acad Emerg Med*. 2003;10(11):1260-1270.  
388 doi:10.1111/j.1553-2712.2003.tb00611.x
- 389 23. Selassie AW, Pickelsimer EE, Frazier L Jr, et al. The effect of insurance status, race,  
390 and gender on ED disposition of persons with traumatic brain injury. *Am J Emerg Med*.  
391 2004;22(6):465-473. doi:10.1016/j.ajem.2004.07.024
- 392 24. Sacks GD, Hill C, Rogers SO Jr. Insurance status and hospital discharge disposition  
393 after trauma: inequities in access to postacute care. *J Trauma*. 2011;71(4):1011-1015.  
394 doi:10.1097/TA.0b013e3182092c27
- 395 25. Arroyo AC, Ewen Wang N, Saynina O, et al. The association between insurance  
396 status and emergency department disposition of injured California children. *Acad Emerg*  
397 *Med*. 2012;19(5):541-551. doi:10.1111/j.1553-2712.2012.01356.x

- 398 26. Wilson S, Dev S, Mahan M, et al. Identifying disparity in emergency department length  
399 of stay and admission likelihood. *World J Emerg Med.* 2016;7(2):111-116.  
400 doi:10.5847/wjem.j.1920-8642.2016.02.005
- 401 27. Lo AX, Donnelly JP, Durant RW, et al. A national study of U.S. emergency  
402 departments: racial disparities in hospitalizations for heart failure. *Am J Prev Med.*  
403 2018;55(5 Suppl 1):S31-S39. doi:10.1016/j.amepre.2018.05.020
- 404 28. Ho J, Burbridge H, Raumatı I, et al. Disposition disparities in an urban tertiary  
405 emergency department. *Emerg Med Australas.* 2022;34(4):626-628. doi:10.1111/1742-  
406 6723.13996
- 407 29. Haines K, Freeman J, Vastaas C, Rust C, Cox C, Kasotakis G, Fuller M,  
408 Krishnamoorthy V, Siciliano M, Alger A, Montgomery S, Agarwal S. "I'm Leaving": Factors  
409 That Impact Against Medical Advice Disposition Post-Trauma. *J Emerg Med.* 2020  
410 Apr;58(4):691-697. doi: 10.1016/j.jemermed.2019.12.023. Epub 2020 Mar 12. PMID:  
411 32171476.
- 412 30. Keneally RJ, Mazzeffi MA, Estroff JM, Yi JN, Maman SR, Heinz ER, Chow JH. Factors  
413 Associated With a Discharge Against Medical Advice From an Emergency Department in  
414 Adult Patients With Appendicitis. *J Emerg Med.* 2023 Jan;64(1):40-46. doi:  
415 10.1016/j.jemermed.2022.10.006. Epub 2023 Jan 13. PMID: 36642675.
- 416 31. Shi Y, Qin Y, Zheng Z, Wang P, Liu J. Risk factor analysis and multiple predictive  
417 machine learning models for mortality in COVID-19: a multicenter and multi-ethnic cohort  
418 study. *J Emerg Med.* 2023 Jun 20. doi: 10.1016/j.jemermed.2023.06.012.

- 419 32. U.S. Census Bureau. Small Area Income and Poverty Estimation. 2021. Accessed  
420 August 23, 2023. <https://www.census.gov/programs-surveys/saipe.html>
- 421 33. Chmielewski N, Moretz J. ESI triage distribution in U.S. emergency departments. *Adv*  
422 *Emerg Nurs J.* 2022;44(1):46-53. doi:10.1097/TME.00000000000039034. Grafstein E,  
423 Bullard MJ, Warren D, et al; CTAS National Working Group. Revision of the Canadian  
424 Emergency Department Information System (CEDIS) Presenting Complaint List version  
425 1.1. *CJEM.* 2008;10(2):151-173. doi:10.1017/s1481803500009878
- 426 35. Elixhauser A, Steiner C, Harris DR, et al. Comorbidity measures for use with  
427 administrative data. *Med Care.* 1998;36(1):8-27. doi:10.1097/00005650-199801000-  
428 00004
- 429 36. van Walraven C, Austin PC, Jennings A, et al. A modification of the Elixhauser  
430 comorbidity measures into a point system for hospital death using administrative  
431 data. *Med Care.* 2009;47(6):626-633. doi:10.1097/MLR.0b013e31819432e5
- 432 37. Gasparini A. Comorbidity: An R package for computing comorbidity scores. *J Open*  
433 *Source Softw.* 2018; 3(23): 648. doi:[10.21105/joss.00648](https://doi.org/10.21105/joss.00648)
- 434 38. Breiman, L. (2001). Random Forests. *Machine Learning*, 45(1), 5-32
- 435 39. Hastie, T., Tibshirani, R., Friedman, J. (2009). Random Forests. In: *The Elements of*  
436 *Statistical Learning*. Springer Series in Statistics. Springer, New York, NY.  
437 [https://doi.org/10.1007/978-0-387-84858-7\\_15](https://doi.org/10.1007/978-0-387-84858-7_15)
- 438 40. A. Liaw and M. Wiener (2002). Classification and Regression by randomForest. *R*  
439 *News* 2(3), 18-22.

440 41. R Core Team, *R: a Language and Environment for Statistical Computing*. R  
441 *Foundation for Statistical Computing*, 2022. Accessed September 18,  
442 2022. <http://www.R-project.org/>

443 42. Wu KH, Chen IC, Li CJ, et al. The influence of physician seniority on disparities  
444 of admit/discharge decision making for ED patients. *Am J Emerg Med*.  
445 2012;30(8):1555-1560. doi:10.1016/j.ajem.2012.01.011

446 43. Naik RP, Derebail VK, Grams ME, et al. Association of sickle cell trait with chronic  
447 kidney disease and albuminuria in African Americans. *JAMA*. 2014;312(20):2115-2125.  
448 doi:10.1001/jama.2014.15063

449

450

451

452

453

454

455

456

457

458

459

Race-Sex Differences in ED Disposition Decisions

460 **TABLES**

461 *Table 1 Breakdown of study patient characteristics at each ED with associated admission rates. Admission rates are*  
 462 *calculated by dividing the number of patients from each category who were admitted by the total number of patients*  
 463 *for that category.*

|                         | ED A              |                | ED B              |                | ED C              |                |
|-------------------------|-------------------|----------------|-------------------|----------------|-------------------|----------------|
|                         | Patient Count (%) | Admission Rate | Patient Count (%) | Admission Rate | Patient Count (%) | Admission Rate |
| All patients            | 28,341 (100%)     | 35.5%          | 39,048 (100%)     | 30.3%          | 26,598 (100%)     | 19.2%          |
| Age                     |                   |                |                   |                |                   |                |
| 18-40                   | 9,128 (32.2%)     | 22.5%          | 10,726 (27.5%)    | 11.7%          | 9,624 (36.2%)     | 6.21%          |
| 41-64                   | 11,477 (40.5%)    | 36.9%          | 12,565 (32.2%)    | 26.5%          | 9,353 (35.2%)     | 19.9%          |
| 65 and older            | 7,736 (27.3%)     | 48.9%          | 15,757 (40.3%)    | 46.0%          | 7,621 (28.6%)     | 34.9%          |
| Race-Sex                |                   |                |                   |                |                   |                |
| Caucasian Male          | 8,062 (28.4%)     | 39.8%          | 10,672 (27.3%)    | 35.7%          | 3,414 (12.8%)     | 27.2%          |
| Caucasian Female        | 10,207 (36.0%)    | 35.0%          | 15,578 (39.9%)    | 32.7%          | 5,536 (20.8%)     | 22.9%          |
| African-American Male   | 4,011 (14.2%)     | 36.0%          | 4,393 (11.3%)     | 28.2%          | 6,463 (24.3%)     | 20.9%          |
| African-American Female | 6,061 (21.4%)     | 30.4%          | 8,405 (21.5%)     | 20.2%          | 11,185 (42.1%)    | 14.1%          |
| Ethnicity               |                   |                |                   |                |                   |                |
| Hispanic or Latino      | 433 (1.5%)        | 21.7%          | 277 (0.7%)        | 20.2%          | 59 (0.2%)         | 16.9%          |
| Not Hispanic or Latino  | 27,791 (98.1%)    | 35.8%          | 38,683 (99.1%)    | 30.4%          | 26,501 (99.7%)    | 19.2%          |
| Other                   | 117 (0.4%)        | 24.8%          | 88 (0.2%)         | 25.0%          | 38 (0.1%)         | 26.3%          |
| Insurance               |                   |                |                   |                |                   |                |
| Commercial/Other        | 12,642 (44.6%)    | 32.6%          | 21,032 (53.9%)    | 27.3%          | 8,090 (30.4%)     | 16.9%          |
| Medicare                | 4,288 (15.1%)     | 50.4%          | 8,744 (22.4%)     | 46.0%          | 4,201 (15.8%)     | 34.1%          |

Race-Sex Differences in ED Disposition Decisions

|                     |                   |       |                   |       |                   |       |
|---------------------|-------------------|-------|-------------------|-------|-------------------|-------|
| Medicaid            | 6,979<br>(24.6%)  | 41.2% | 5,280<br>(13.5%)  | 29.9% | 9,196<br>(34.6%)  | 20.9% |
| Self-Pay            | 4,432<br>(15.7%)  | 20.6% | 3,992<br>(10.2%)  | 12.2% | 5,111<br>(19.2%)  | 7.79% |
| Weighted Elixhauser |                   |       |                   |       |                   |       |
| 0 and below         | 16,856<br>(59.5%) | 24.9% | 22,706<br>(58.2%) | 18.1% | 20,057<br>(75.4%) | 12.5% |
| 1-6                 | 5,260<br>(18.5%)  | 43.9% | 6,648<br>(17.0%)  | 39.7% | 3,062<br>(11.5%)  | 33.9% |
| 7 and above         | 6,225<br>(22.0%)  | 57.4% | 9,694<br>(24.8%)  | 52.5% | 3,479<br>(13.1%)  | 45.5% |

464

465 *Table 2 Odds ratios and 95% confidence intervals (CIs) for logistic regression models using all data; statistically*

466 *significant (p<0.05) CIs are bolded.*

|                                          | ED A                      | ED B                      | ED C                      |
|------------------------------------------|---------------------------|---------------------------|---------------------------|
| Age Group (Ref: 18-40)                   |                           |                           |                           |
| 41-64                                    | <b>1.68 (1.57 - 1.79)</b> | <b>2.22 (2.06 - 2.39)</b> | <b>2.25 (2.03 - 2.50)</b> |
| 65+                                      | <b>2.25 (2.07 - 2.44)</b> | <b>3.88 (3.58 - 4.21)</b> | <b>3.25 (2.89 - 3.66)</b> |
| Race-Sex (Ref: Caucasian Male)           |                           |                           |                           |
| Caucasian Female                         | <b>0.87 (0.81 - 0.93)</b> | <b>0.89 (0.84 - 0.94)</b> | <b>0.82 (0.74 - 0.92)</b> |
| African-American Male                    | <b>0.81 (0.75 - 0.89)</b> | <b>0.82 (0.75 - 0.89)</b> | <b>0.75 (0.67 - 0.83)</b> |
| African-American Female                  | <b>0.70 (0.64 - 0.75)</b> | <b>0.56 (0.52 - 0.60)</b> | <b>0.55 (0.49 - 0.61)</b> |
| Ethnicity (Ref: Not Hispanic/Latino)     |                           |                           |                           |
| Hispanic or Latino                       | <b>0.71 (0.56 - 0.91)</b> | 0.82 (0.59 - 1.12)        | 1.07 (0.51 - 2.25)        |
| Other                                    | 0.74 (0.47 - 1.14)        | 1.01 (0.60 - 1.70)        | 1.69 (0.76 - 3.76)        |
| Complaint Category (Ref: Cardiovascular) |                           |                           |                           |
| Ear/Nose/Throat                          | <b>0.70 (0.59 - 0.82)</b> | <b>0.38 (0.31 - 0.47)</b> | <b>0.32 (0.24 - 0.42)</b> |
| General/Environmental                    | <b>1.81 (1.62 - 2.01)</b> | <b>1.46 (1.32 - 1.62)</b> | 0.98 (0.85 - 1.12)        |
| Gastrointestinal                         | <b>1.42 (1.31 - 1.55)</b> | <b>1.24 (1.16 - 1.33)</b> | <b>0.77 (0.69 - 0.85)</b> |
| Genitourinary                            | <b>0.56 (0.48 - 0.64)</b> | <b>0.34 (0.29 - 0.39)</b> | <b>0.40 (0.33 - 0.47)</b> |
| Mental Health                            | 0.80 (0.58 - 1.10)        | <b>0.43 (0.29 - 0.65)</b> | <b>0.40 (0.23 - 0.70)</b> |

Race-Sex Differences in ED Disposition Decisions

|                                      |                              |                              |                              |
|--------------------------------------|------------------------------|------------------------------|------------------------------|
| Neurologic                           | <b>0.61 (0.54 - 0.68)</b>    | <b>0.82 (0.74 - 0.89)</b>    | <b>0.59 (0.52 - 0.67)</b>    |
| Obstetrics/Gynecology                | <b>0.41 (0.32 - 0.52)</b>    | <b>0.38 (0.29 - 0.50)</b>    | <b>0.35 (0.25 - 0.49)</b>    |
| Ophthalmology                        | <b>0.47 (0.36 - 0.62)</b>    | <b>0.44 (0.30 - 0.65)</b>    | <b>0.50 (0.28 - 0.90)</b>    |
| Orthopedic                           | <b>0.77 (0.69 - 0.86)</b>    | <b>0.60 (0.55 - 0.66)</b>    | <b>0.52 (0.45 - 0.60)</b>    |
| Respiratory                          | <b>1.69 (1.51 - 1.89)</b>    | <b>1.43 (1.30 - 1.56)</b>    | 1.10 (0.97 - 1.23)           |
| Skin                                 | <b>1.56 (1.40 - 1.74)</b>    | 1.07 (0.94 - 1.21)           | 0.96 (0.78 - 1.17)           |
| Substance                            | 1.01 (0.79 - 1.30)           | <b>0.67 (0.49 - 0.94)</b>    | 0.72 (0.31 - 1.69)           |
| Trauma                               | <b>0.65 (0.58 - 0.74)</b>    | <b>0.53 (0.48 - 0.59)</b>    | <b>0.37 (0.32 - 0.44)</b>    |
| Insurance (Ref:<br>Commercial/Other) |                              |                              |                              |
| Medicaid                             | <b>1.46 (1.36 - 1.56)</b>    | <b>1.26 (1.17 - 1.36)</b>    | <b>1.20 (1.10 - 1.31)</b>    |
| Medicare                             | <b>1.32 (1.22 - 1.44)</b>    | <b>1.13 (1.06 - 1.20)</b>    | <b>1.16 (1.05 - 1.29)</b>    |
| Self-Pay                             | <b>0.74 (0.68 - 0.81)</b>    | <b>0.72 (0.64 - 0.80)</b>    | <b>0.77 (0.67 - 0.87)</b>    |
| Elixhauser                           | <b>1.05 (1.05 - 1.05)</b>    | <b>1.05 (1.05 - 1.06)</b>    | <b>1.06 (1.05 - 1.07)</b>    |
| Time of Day (Ref: 12 am to 4<br>am)  |                              |                              |                              |
| 4 am – 8 am                          | 0.94 (0.85 - 1.05)           | 0.91 (0.82 - 1.02)           | 0.94 (0.81 - 1.09)           |
| 8 am – 12 pm                         | <b>0.81 (0.73 - 0.91)</b>    | <b>0.82 (0.74 - 0.90)</b>    | <b>1.44 (1.26 - 1.66)</b>    |
| 12 pm – 4 pm                         | 0.95 (0.87 - 1.04)           | 1.02 (0.94 - 1.11)           | <b>1.80 (1.60 - 2.03)</b>    |
| 4 pm – 8 pm                          | 1.02 (0.93 - 1.11)           | 1.04 (0.96 - 1.13)           | <b>2.06 (1.82 - 2.33)</b>    |
| 8 pm – 12 am                         | 1.02 (0.94 - 1.12)           | 1.02 (0.94 - 1.11)           | <b>1.40 (1.24 - 1.59)</b>    |
| Day of Week (Ref: Friday)            |                              |                              |                              |
| Monday                               | 0.94 (0.86 - 1.02)           | 1.04 (0.95 - 1.13)           | 1.11 (0.98 - 1.25)           |
| Tuesday                              | 0.99 (0.90 - 1.09)           | 1.05 (0.96 - 1.15)           | 0.99 (0.88 - 1.13)           |
| Wednesday                            | 1.02 (0.93 - 1.12)           | <b>1.12 (1.03 - 1.23)</b>    | 1.07 (0.94 - 1.21)           |
| Thursday                             | 0.99 (0.90 - 1.09)           | <b>1.17 (1.08 - 1.28)</b>    | 1.10 (0.97 - 1.24)           |
| Saturday                             | <b>0.86 (0.77 - 0.95)</b>    | 0.98 (0.89 - 1.07)           | 0.88 (0.77 - 1.01)           |
| Sunday                               | 0.94 (0.85 - 1.04)           | 0.93 (0.85 - 1.01)           | 1.00 (0.88 - 1.13)           |
| Waiting Time                         | <b>1.002 (1.001 – 1.003)</b> | <b>1.001 (1.001 – 1.002)</b> | <b>1.001 (1.001 – 1.002)</b> |

467

468



469 **FIGURES**

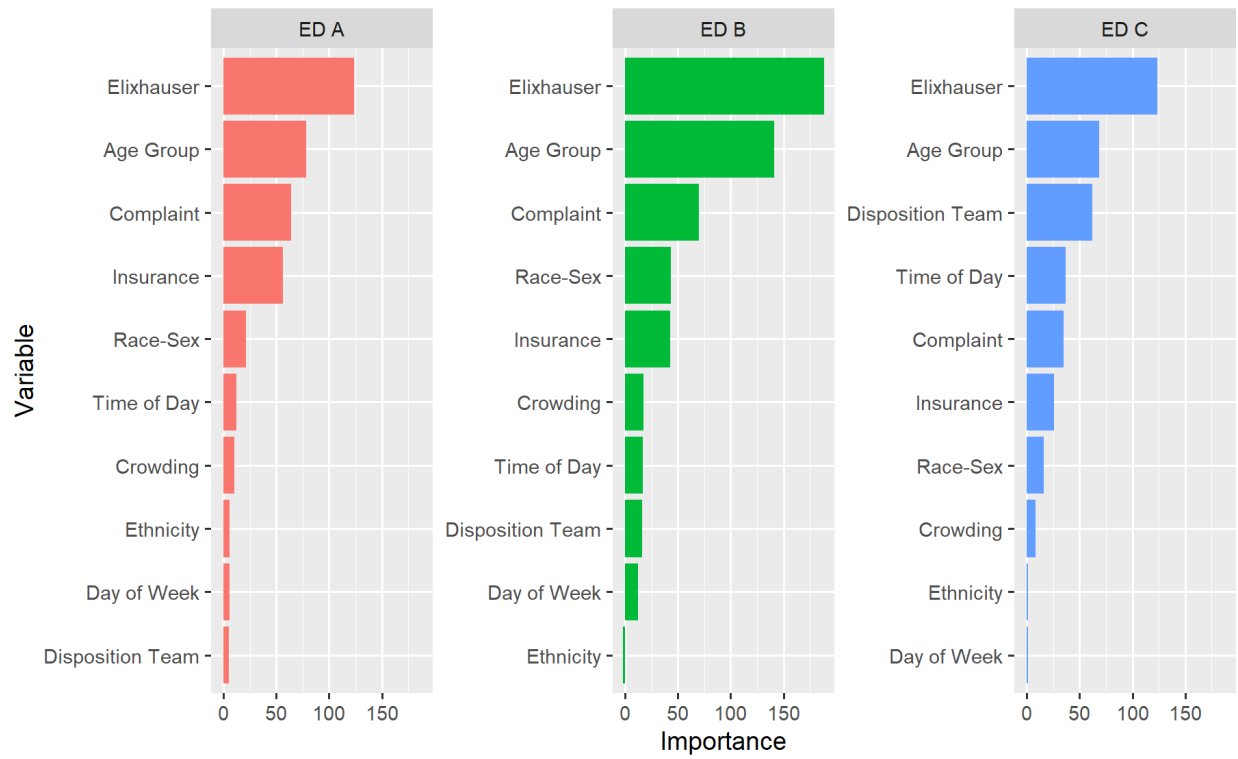

470

471 *Figure 1 Variable importance plots based off mean decrease in accuracy for the three different random forests*

472 *associated with the three EDs.*

Race-Sex Differences in ED Disposition Decisions

473

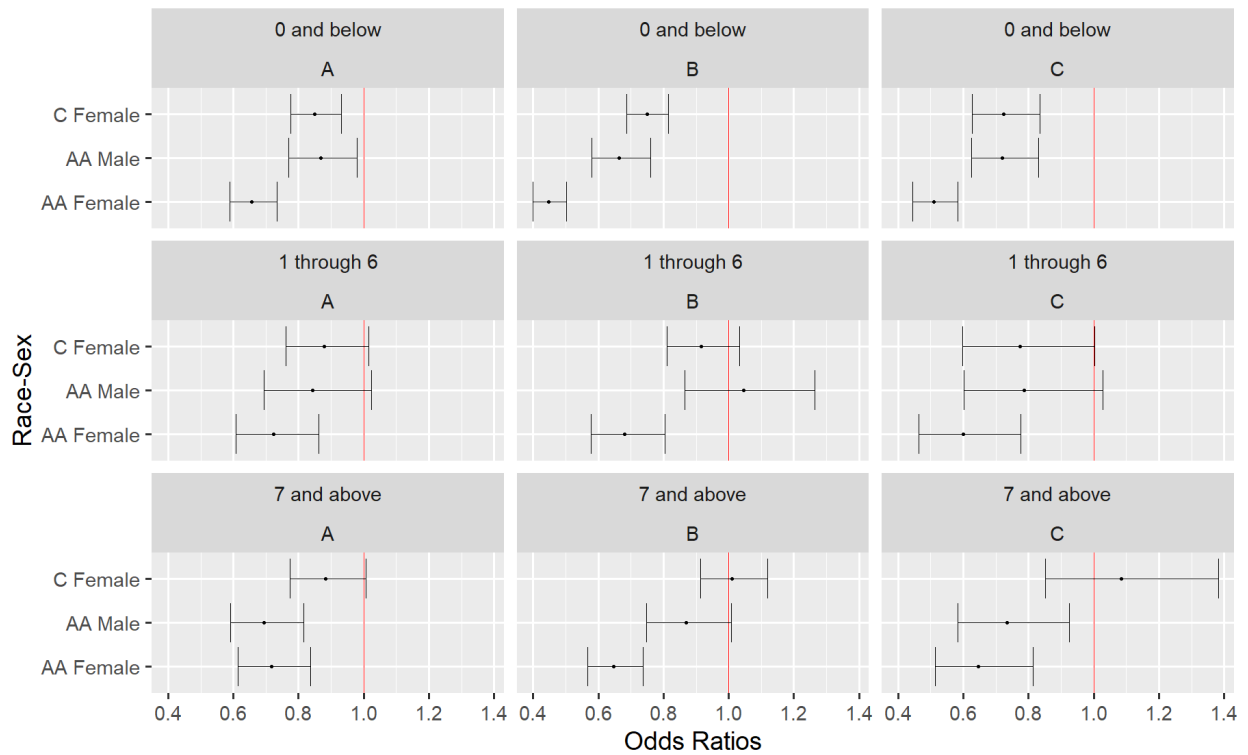

474

475 *Figure 2 Odds ratio plots with 95% CIs for the Race-Sex variable for patients split by Elixhauser score at each ED,*  
 476 *with the reference level being Caucasian men. Each row corresponds to a range of Elixhauser scores, and each*  
 477 *column is an ED. On the vertical axis labels, AA means African-American, and C means Caucasian.*

478

Race-Sex Differences in ED Disposition Decisions

479

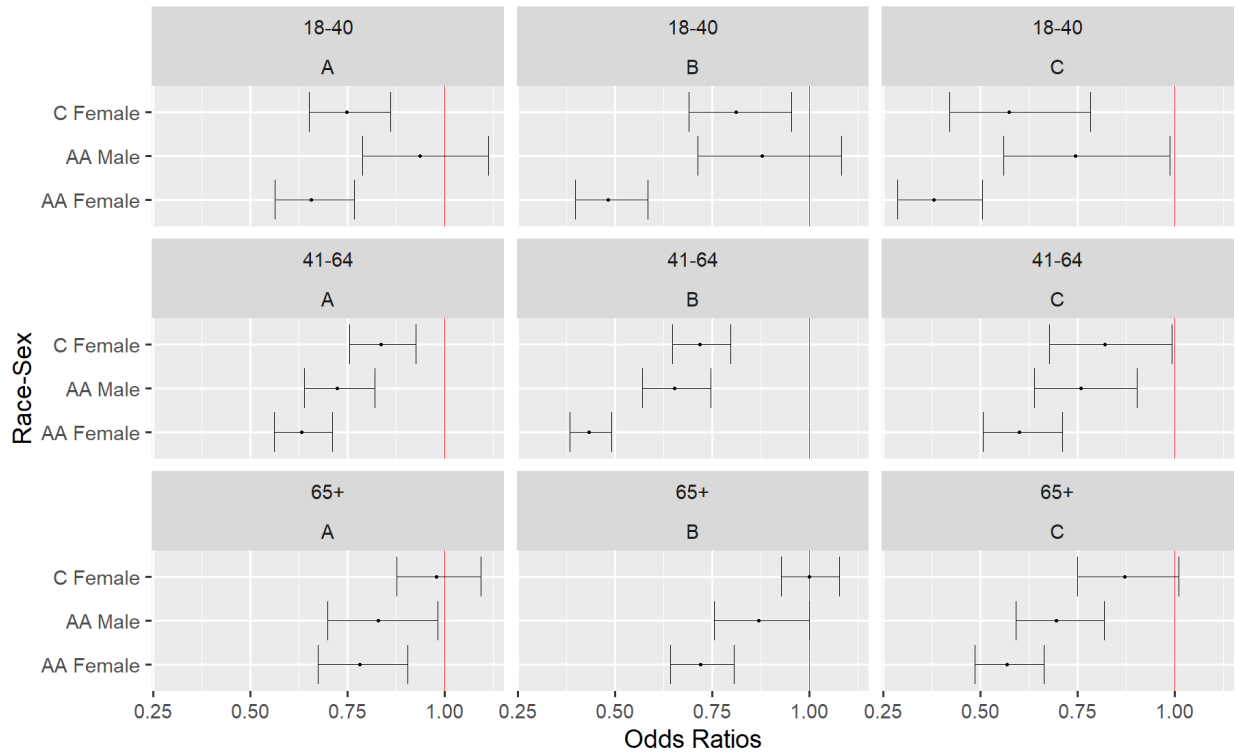

480

481 *Figure 3 Odds ratio plots with 95% CIs for the Race-Sex variable for patients split by age group at each ED, with the*  
 482 *reference level being Caucasian men. Each row corresponds to a different age group and each column is an ED.*

483

484

Race-Sex Differences in ED Disposition Decisions

485

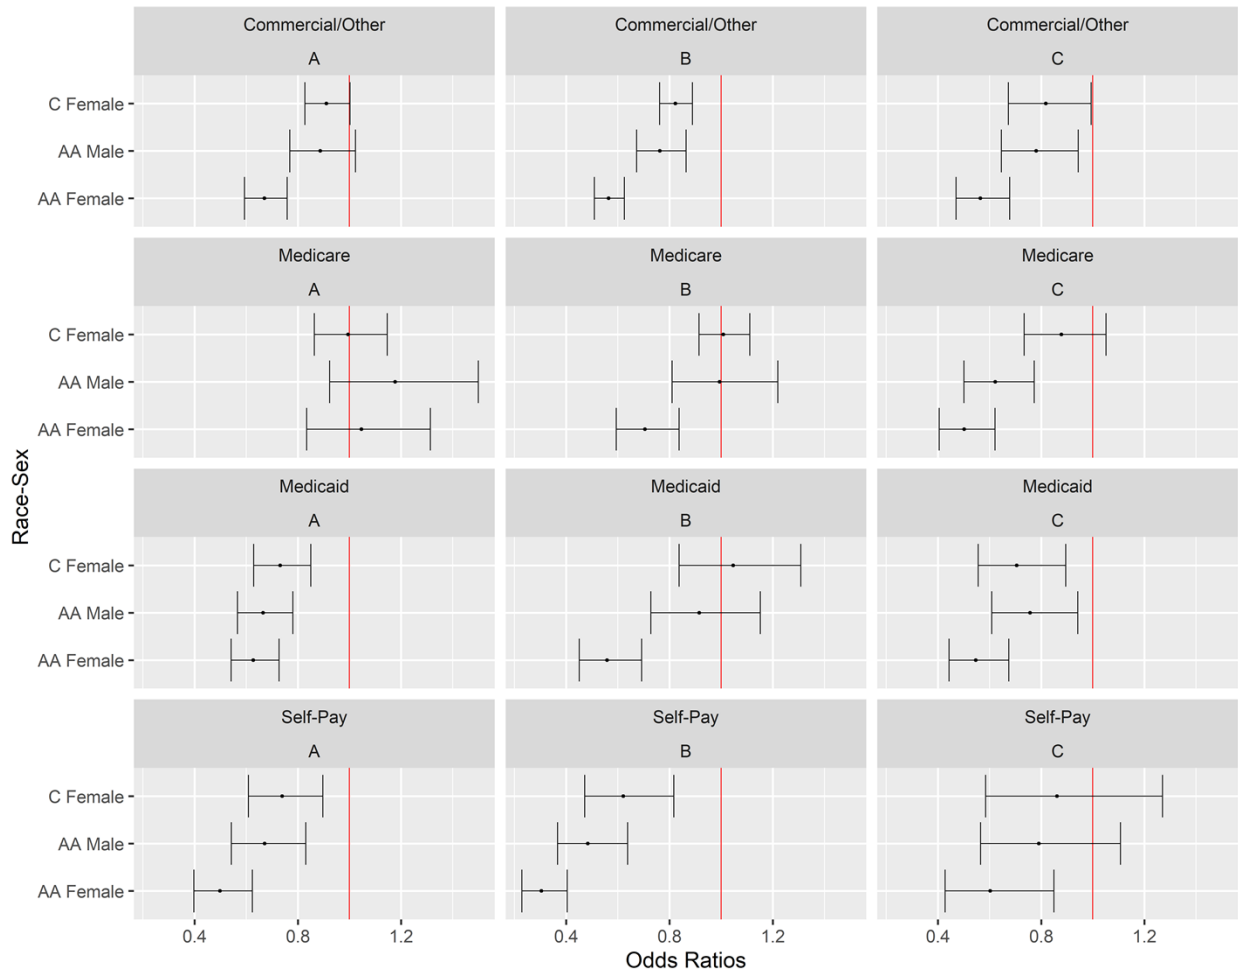

486

487 *Figure 4 Odds ratio plots with 95% CIs for the Race-Sex variable for patients split by insurance status at each ED,*  
 488 *with the reference level being Caucasian men. Each row corresponds to a different insurance group and each column*  
 489 *is an ED.*

490

491

492

493

494 **SUPPLEMENT**

495 To ensure that there are no significant effects of multicollinearity in our logistic regression  
 496 model for each ED, we calculated generalized variable inflation factors (GVIF), see, e.g.,  
 497 Fox and Monette (1992). For variables with one degree of freedom, the GVIF is equivalent  
 498 to the variable inflation factor (VIF) whereas for variables with two or more degrees of  
 499 freedom, calculating  $[(GVIF)^{\frac{1}{2\eta}}]^2$  allows us to use the same VIF thresholds as for  
 500 continuous variables (i.e., those with one degree of freedom). Table S1 shows that the  
 501 highest value for this calculation is approximately 1.295, which is below the recommended  
 502 threshold of 2. Therefore, we conclude that multicollinearity is not a concern for either  
 503 model.

504 *Table S1  $[(GVIF)^{\frac{1}{2\eta}}]^2$  values for logistic regression models, where  $\eta$  is the degrees of freedom associated with each*  
 505 *predictor. These are directly comparable to VIF thresholds used for continuous variables.*

| <b>Predictor</b>         | <b>ED A</b> | <b>ED B</b> | <b>ED C</b> |
|--------------------------|-------------|-------------|-------------|
| Age Group                | 1.237       | 1.295       | 1.285       |
| Race-Sex                 | 1.046       | 1.064       | 1.051       |
| Ethnicity                | 1.005       | 1.003       | 1.003       |
| Complaint Category       | 1.028       | 1.011       | 1.012       |
| Insurance                | 1.155       | 1.184       | 1.175       |
| Elixhauser               | 1.124       | 1.157       | 1.111       |
| Disposition Care<br>Area | 1.111       | 1.030       | 1.062       |
| Time of Day              | 1.056       | 1.045       | 1.024       |
| Day of Week              | 1.014       | 1.003       | 1.007       |
| Crowding                 | 1.275       | 1.180       | 1.059       |

506

Race-Sex Differences in ED Disposition Decisions

507 Table S2 Additional breakdown of study patient characteristics with the same columns as Table 1.

|                           | ED A                 |                   | ED B                 |                   | ED C                 |                   |
|---------------------------|----------------------|-------------------|----------------------|-------------------|----------------------|-------------------|
|                           | Patient<br>Count (%) | Admission<br>Rate | Patient<br>Count (%) | Admission<br>Rate | Patient<br>Count (%) | Admission<br>Rate |
| <b>Complaint Category</b> |                      |                   |                      |                   |                      |                   |
| Cardiovascular            | 4292<br>(15.1%)      | 36.4%             | 8940<br>(22.9%)      | 34.1%             | 4002<br>(15.1%)      | 28.1%             |
| ENT                       | 1063<br>(3.8%)       | 24.1%             | 882<br>(2.3%)        | 15.6%             | 783<br>(2.9%)        | 8.05%             |
| General/Environ           | 2360<br>(8.3%)       | 51.6%             | 2335<br>(6.0%)       | 42.3%             | 1653<br>(6.2%)       | 30.2%             |
| Gastrointestinal          | 6096<br>(21.5%)      | 40.5%             | 8562<br>(21.9%)      | 31.9%             | 6447<br>(24.2%)      | 16.6%             |
| Genitourinary             | 1483<br>(5.2%)       | 22.8%             | 2039<br>(5.2%)       | 14.7%             | 1613<br>(6.1%)       | 11.8%             |
| Mental Health             | 255<br>(0.9%)        | 31.0%             | 222<br>(0.6%)        | 14.0%             | 165<br>(0.6%)        | 9.7%              |
| Neurologic                | 2458<br>(8.7%)       | 24.9%             | 3657<br>(9.4%)       | 28.2%             | 2640<br>(9.9%)       | 17.4%             |
| Obstetrics                | 693<br>(2.5%)        | 10.8%             | 1082<br>(2.8%)       | 6.1%              | 1123<br>(4.2%)       | 3.5%              |
| Ophthalmology             | 388<br>(1.4%)        | 17.8%             | 209<br>(0.5%)        | 16.7%             | 138<br>(0.5%)        | 10.1%             |
| Orthopedic                | 2814<br>(9.9%)       | 29.0%             | 3362<br>(8.6%)       | 23.3%             | 2303<br>(8.7%)       | 13.8%             |
| Respiratory               | 2098<br>(7.4%)       | 49.0%             | 3408<br>(8.7%)       | 44.4%             | 2880<br>(10.8%)      | 29.7%             |
| Skin                      | 2190<br>(7.7%)       | 42.9%             | 1485<br>(3.8%)       | 30.0%             | 824<br>(3.1%)        | 20.0%             |
| Substance Abuse           | 363<br>(1.3%)        | 27.8%             | 312<br>(0.8%)        | 15.1%             | 45<br>(0.2%)         | 15.6%             |
| Trauma                    | 1788<br>(6.3%)       | 28.2%             | 2553<br>(6.5%)       | 26.8%             | 1982<br>(7.5%)       | 14.9%             |
| <b>Time of Day</b>        |                      |                   |                      |                   |                      |                   |
| 12 am to 4 am             | 4900<br>(17.3%)      | 34.4%             | 5459<br>(14.0%)      | 27.7%             | 3643<br>(13.7%)      | 14.9%             |
| 4 am to 8 am              | 2698<br>(9.5%)       | 32.7%             | 3285<br>(8.4%)       | 27.6%             | 2491<br>(9.4%)       | 15.1%             |
| 8 am to 12 pm             | 2722<br>(9.6%)       | 30.3%             | 4231<br>(10.8%)      | 26.0%             | 3196<br>(12.0%)      | 18.3%             |

Race-Sex Differences in ED Disposition Decisions

|                    |                 |       |                 |       |                 |       |
|--------------------|-----------------|-------|-----------------|-------|-----------------|-------|
| 12 pm to 4 pm      | 5301<br>(18.7%) | 35.9% | 8185<br>(21.0%) | 31.9% | 6335<br>(23.8%) | 20.9% |
| 4 pm to 8 pm       | 6321<br>(22.3%) | 37.8% | 8976<br>(23.0%) | 32.5% | 5554<br>(20.9%) | 23.2% |
| 8 pm to 12 am      | 6399<br>(22.6%) | 37.3% | 8912<br>(22.8%) | 31.3% | 5379<br>(20.2%) | 18.7% |
| <b>Day of Week</b> |                 |       |                 |       |                 |       |
| Monday             | 4039<br>(14.2%) | 35.6% | 5559<br>(14.2%) | 31.3% | 3872<br>(14.5%) | 20.9% |
| Tuesday            | 4251<br>(15.0%) | 36.2% | 5676<br>(14.5%) | 30.5% | 4120<br>(15.5%) | 19.2% |
| Wednesday          | 4249<br>(15.0%) | 36.9% | 5581<br>(14.3%) | 31.2% | 3827<br>(14.4%) | 19.8% |
| Thursday           | 3979<br>(14.0%) | 36.9% | 5634<br>(14.4%) | 32.4% | 3916<br>(14.7%) | 20.2% |
| Friday             | 4074<br>(14.4%) | 36.9% | 5691<br>(14.6%) | 29.9% | 3753<br>(14.1%) | 19.2% |
| Saturday           | 3934<br>(13.9%) | 32.5% | 5491<br>(14.1%) | 28.8% | 3477<br>(13.1%) | 16.7% |
| Sunday             | 3815<br>(13.5%) | 33.6% | 5416<br>(13.9%) | 28.0% | 3633<br>(13.7%) | 18.5% |

508

509

510 **References**

- 511 1. Fox J, Monette G. Generalized collinearity diagnostics. *J Am Stat Assoc*, 1992;87(417):178-  
 512 183. doi:10.2307/2290467

513
